# Supplementary material for: 2D and 3D mixed MII/CuIImetal–organic frameworks (M = Ca and Sr) withN,N′-2,6-pyridinebis(oxamate) and oxalate: preparation and magneto-structural study
Source: Royal Society of Chemistry journal article supplement (doi:10.1039/c8dt01686k), 2018-01-01
Supplement: c8dt01686k1.pdf [file c8dt01686k1.pdf]

## Electronic Supporting information

### **2D and 3D Mixed M<sup>II</sup>/Cu<sup>II</sup> metal-organic frameworks (M = Ca and Sr) with *N,N'*-2,6-pyridinebis(oxamate) and oxalate: preparation and magneto-structural study**

Tamires S. Fernandes,<sup>a</sup> Wanessa David Canêdo Melo,<sup>a</sup> Lucas H. G. Kalinke,<sup>a,b</sup> Renato Rabelo,<sup>a,c</sup> Ana K. Valdo,<sup>a</sup> Cameron C. da Silva,<sup>a</sup> Felipe T. Martins,<sup>a</sup> Pedro Amorós,<sup>d</sup> Francesc Lloret,<sup>c</sup> Miguel Julve\*<sup>c</sup> and Danielle Cangussu\*<sup>a</sup>

<sup>a</sup>*Universidade Federal de Goiás, Instituto de Química, Campus Samambaia, CP 131, CEP 74001-970 Goiânia, GO, Brazil. E-mail: daniellecangussu@gmail.com.*

<sup>b</sup>*Instituto Federal Goiás, IFG, Anápolis, Av. Pedro Ludovico, s/n, Remy Cury, 75131-457, Anápolis, GO, Brazil.*

<sup>c</sup>*Departament de Química Inorgànica/Instituto de Ciència Molecular (ICMol), Facultat de Química de la Universitat de València, C/ Catedrático José Beltrán 2, 46980 Paterna (València), Spain. E-mail: Miguel.julve@uv.es.*

<sup>d</sup>*Institut de Ciència dels Materials (ICMUV), Universitat de València, C/ Catedrático José Beltrán 2, 46980 Paterna (València), Spain*

## †ESI Contents:

Infrared spectra for **1-3** (Figs. S1-S3);

XPRD patterns for **1-3** (Figs. S4-S6);

Polyhedra of Ca(II) and Sr(II) ions in **1-3** (Figs. S7-S9);

Schematic drawing of the polymer expansion through the oxamate and oxalate bridges in **3** (Fig. S10);

Isotherms of CO<sub>2</sub> adsorption for **1** and **2** (Figs. S11 and S12);

Thermal dependence of the  $\chi_M T$  product for **2** (Fig. S13);

SEM images and EDS spectrum of three selected areas of **3** (Fig. S14)

Structural data for the alkaline-earth cations in **1-3** (Table S1);

Results of the *SHAPE* analysis for the Ca(II) and Sr(II) cores in compounds **1-3** (Table S2).

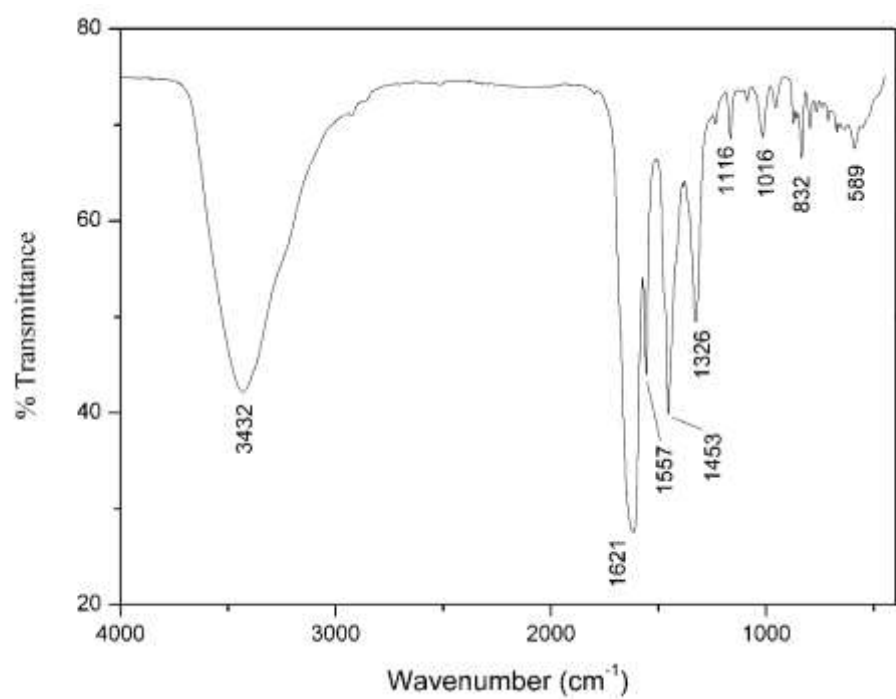

**Figure S1.** IR spectrum of **1**.

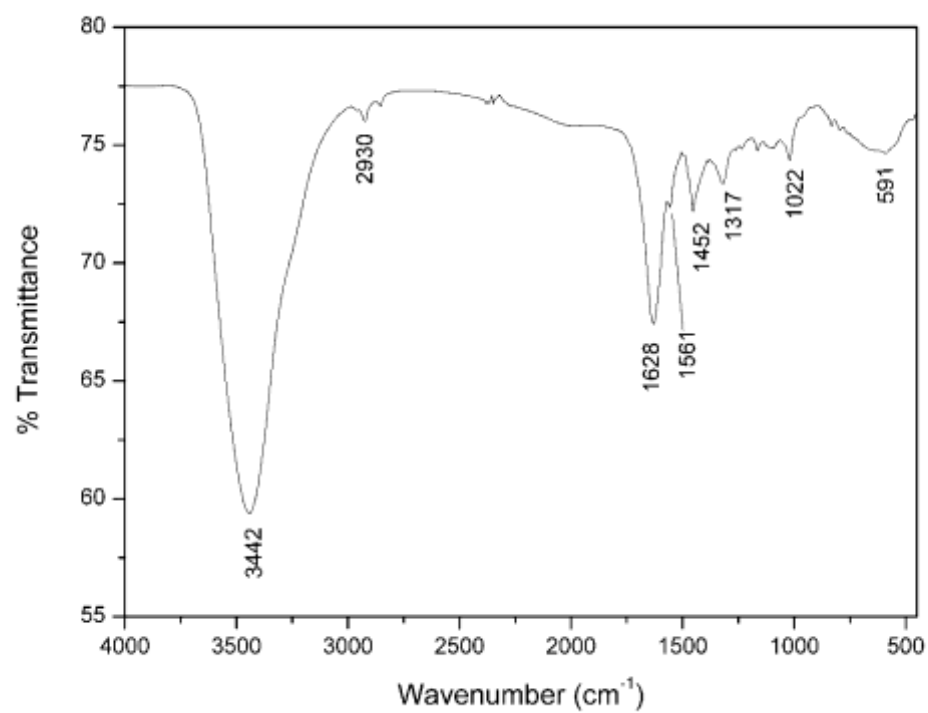

**Figure S2.** IR spectrum of **2**.

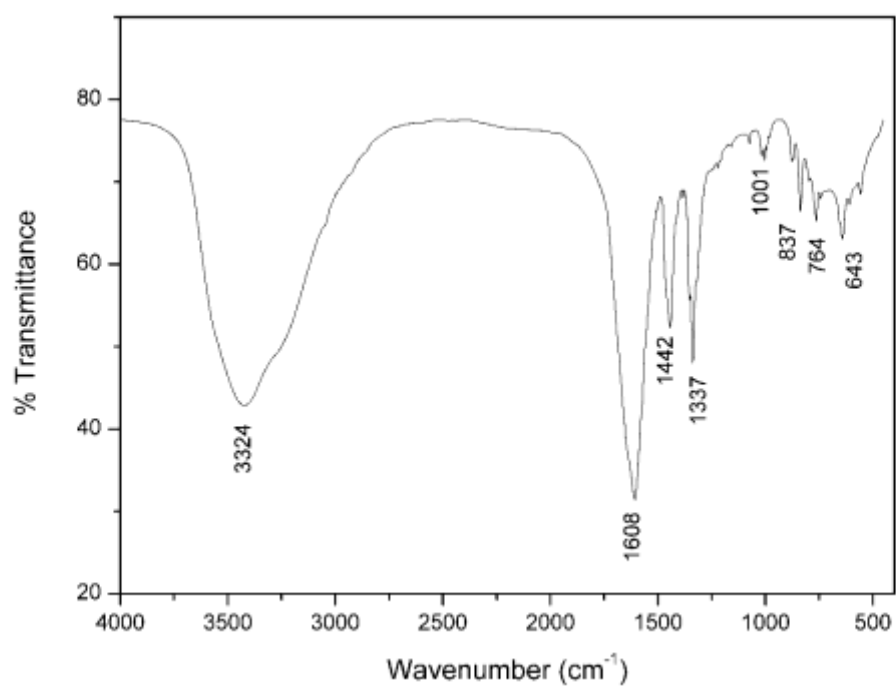

**Figure S3.** IR spectrum of **3**.

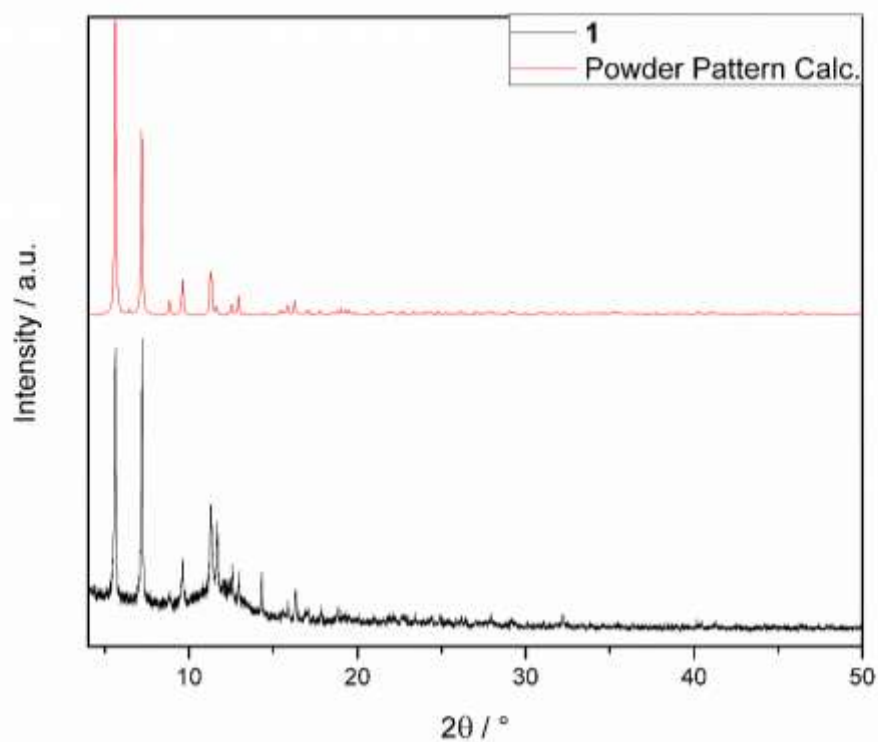

**Figure S4.** PXRD pattern for **1**.

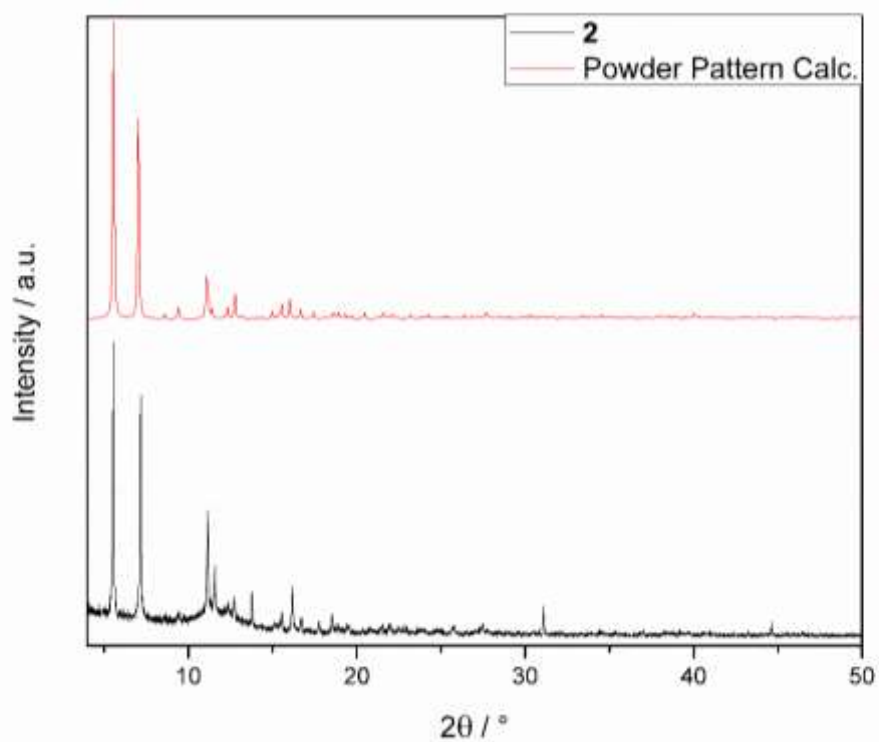

**Figure S5.** PXRD pattern for **2**.

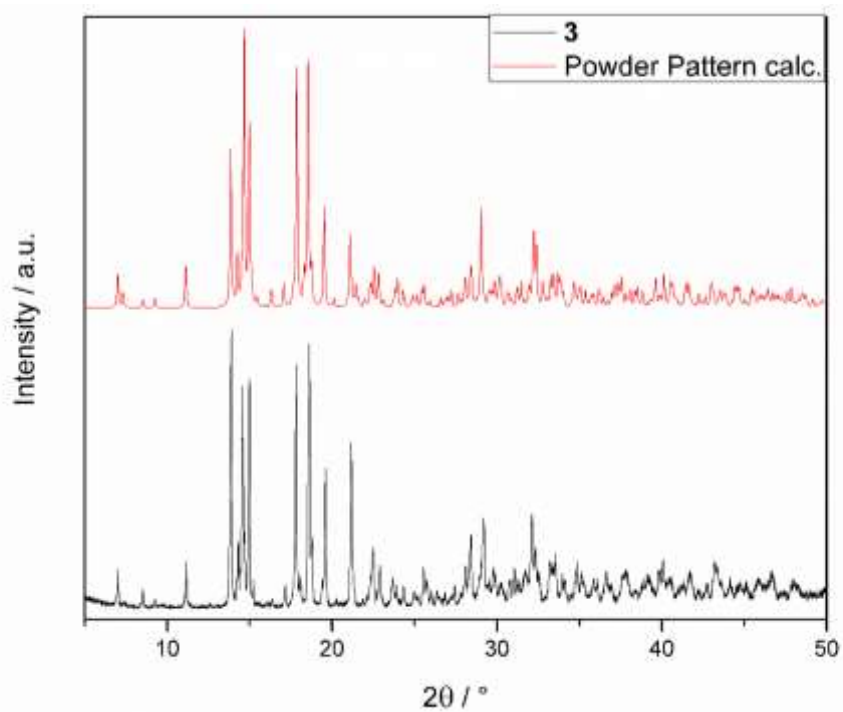

**Figure S6.** PXRD pattern for **3**.

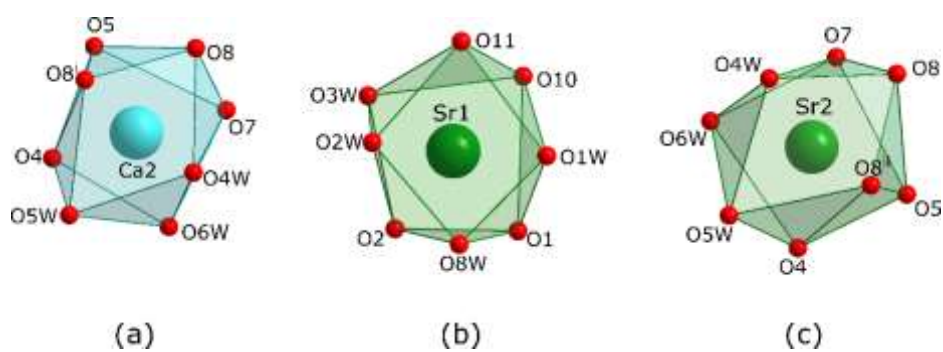

**Figure S7.** Polyhedra of the Ca2 (1), Sr1 (2) and Sr2 (2) atoms.

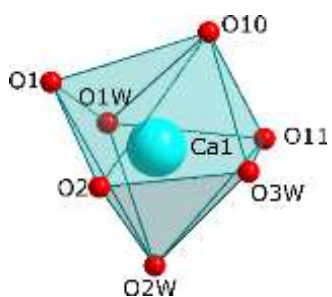

**Figure S8.** Polyhedron of the Ca1 atom in 1.

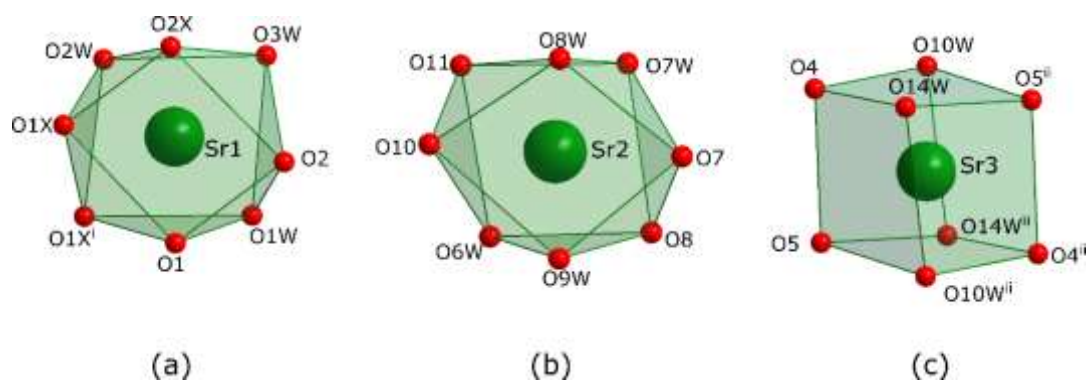

**Figure S9.** Polyhedra of the Sr1, Sr2 and Sr3 atoms in 3.

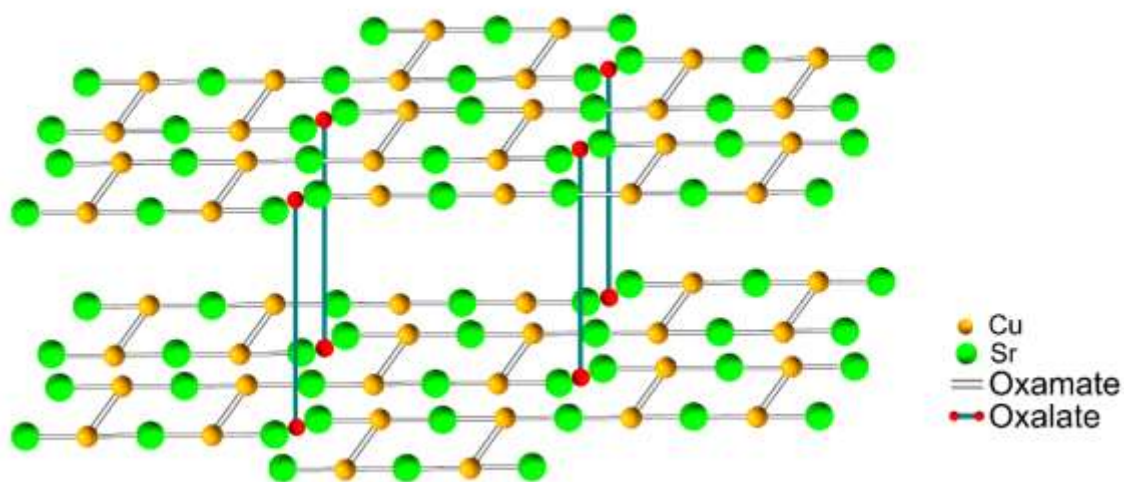

**Figure S10.** Schematic drawing of a fragment of the 3D structure of **3** mediated by the oxamate and oxalate bridges.

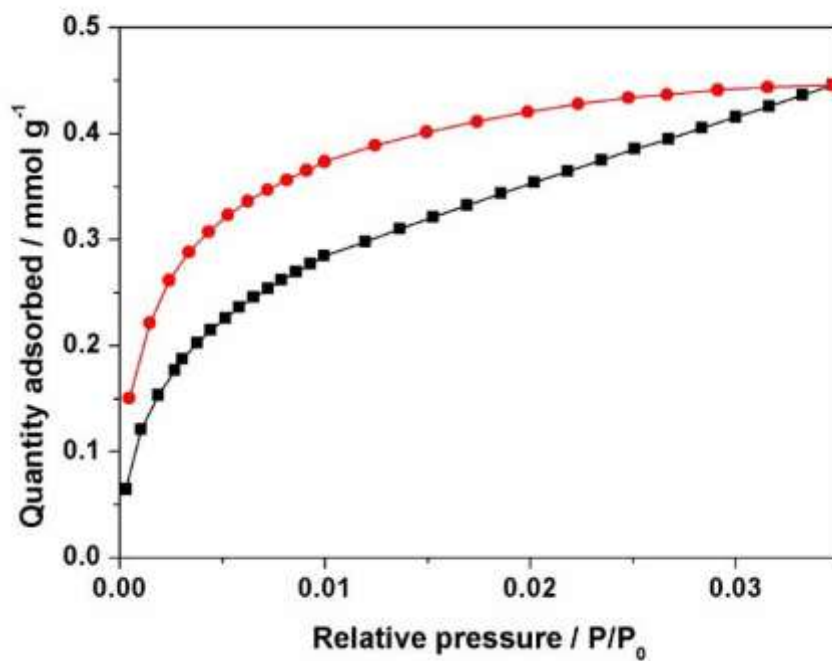

**Figure S11.** CO<sub>2</sub> adsorption isotherm of a solid sample of **1**.

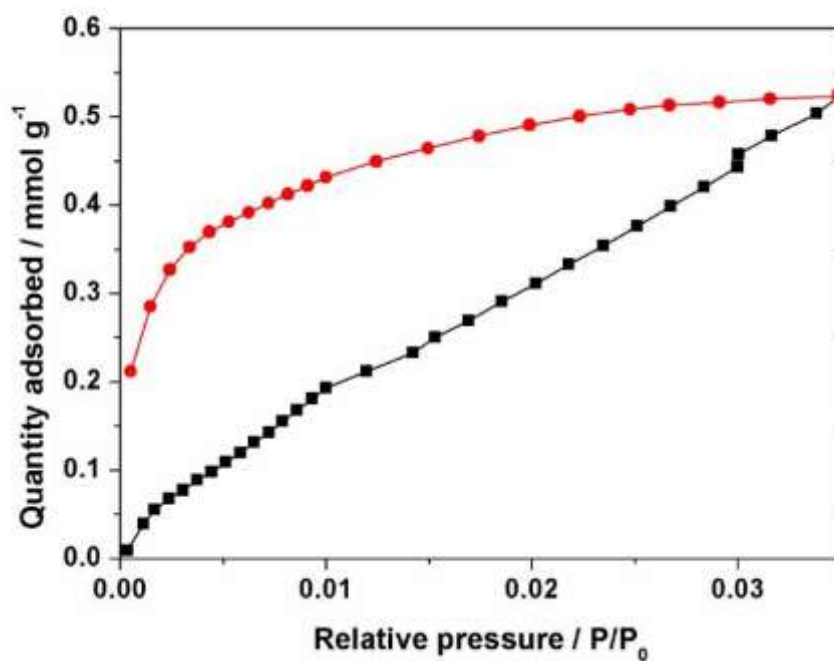

**Figure S12.** CO<sub>2</sub> adsorption isotherm of a solid sample of **2**.

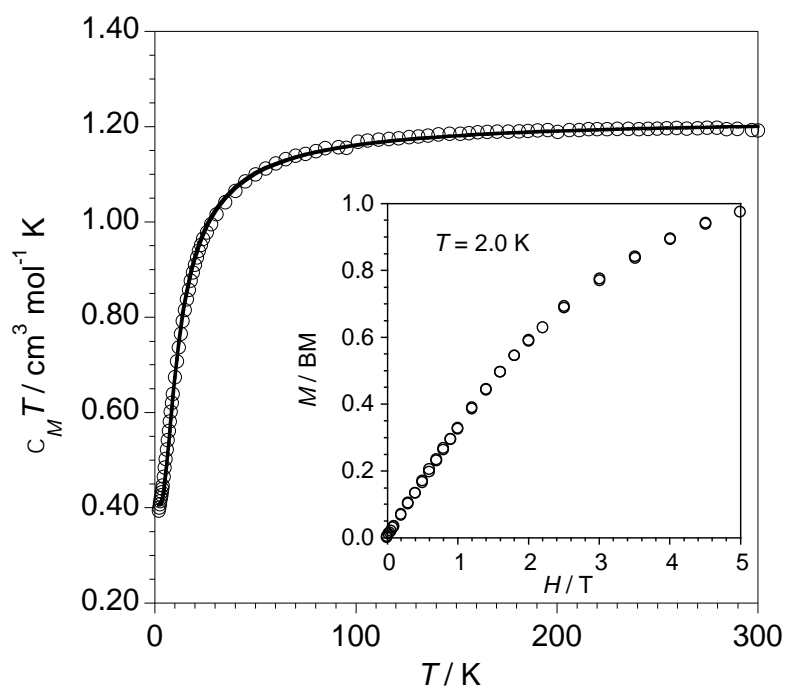

**Figure 13.** Thermal dependence of the  $\chi_M T$  product for **2**: (o) experimental; (—) best-fit curve through eq (2) (see text). The inset shows the field dependence of the magnetization for **2** at 2.0 K.



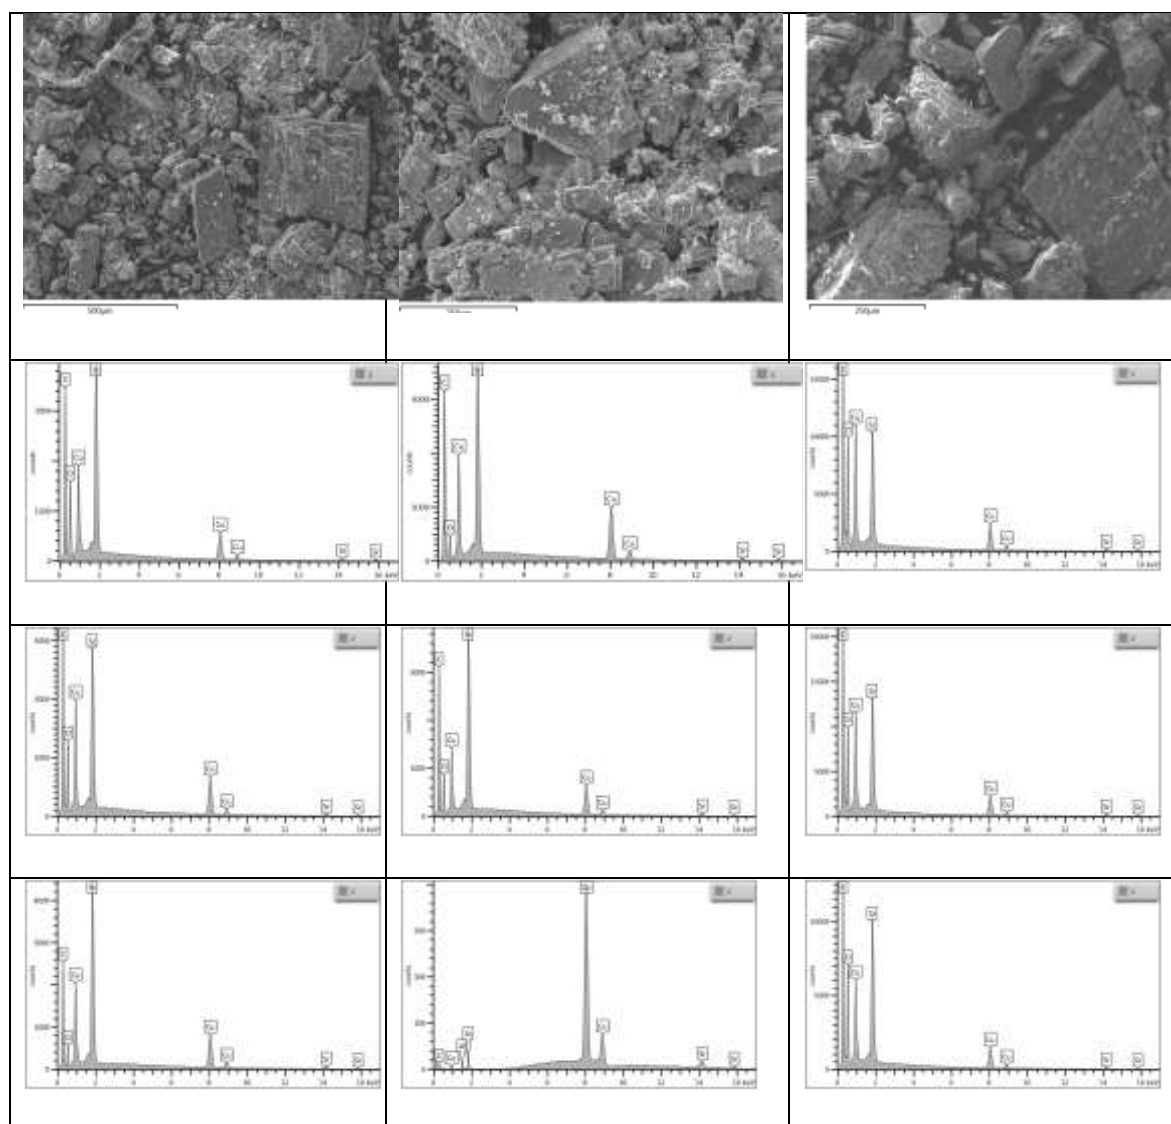

**Figure 14.** SEM images and EDS spectra of three selected areas of **3** (Fig. S14)

**Table S1.** Selected bond lengths (Å) and angles (°) around the alkaline-earth cations of **1-3<sup>a</sup>**.

| <b>1</b>             |           |                      |          |            |           |                           |           |
|----------------------|-----------|----------------------|----------|------------|-----------|---------------------------|-----------|
| Ca1-O1 <sup>i</sup>  | 2.402(4)  | Ca1-O3W <sup>i</sup> | 2.375(6) | Ca2-O4     | 2.463(4)  | Ca2-O8 <sup>ii</sup>      | 2.397(4)  |
| Ca1-O2 <sup>i</sup>  | 2.435(4)  | Ca1-O10              | 2.402(4) | Ca2-O5     | 2.467(4)  | Ca2-O4W                   | 2.489(5)  |
| Ca1-O1W <sup>i</sup> | 2.370(7)  | Ca1-O11              | 2.430(4) | Ca2-O7     | 2.410(4)  | Ca2-O5W                   | 2.563(5)  |
| Ca1-O2W <sup>i</sup> | 2.369(6)  |                      |          | Ca2-O8     | 2.482 (4) | Ca2-O6W                   | 2.423(5)  |
| O1-Ca1-O2            | 66.88(12) | O1W-Ca1-O10          | 91.2(2)  | O4-Ca2-O5W | 68.54(16) | O8-Ca2-O8 <sup>ii</sup>   | 67.02(13) |
| O1-Ca1-O1W           | 76.81(18) | O1W-Ca1-O11          | 79.9 (2) | O4-Ca2-O6W | 77.82(17) | O8-Ca2-O4W                | 73.45(14) |
| O1-Ca1-O2W           | 123.1(3)  | O2W-Ca1-O3W          | 89.0(4)  | O5-Ca2-O7  | 84.42(14) | O8 <sup>ii</sup> -Ca2-O4W | 81.17(15) |

|             |            |                         |            |                         |            |                           |            |
|-------------|------------|-------------------------|------------|-------------------------|------------|---------------------------|------------|
| O1-Ca1-O3W  | 124.6(2)   | O2W-Ca1-O10             | 153.0(3)   | O5-Ca2-O8               | 78.28(12)  | O8-Ca2-O5W                | 134.44(16) |
| O1-Ca1-O10  | 82.63(14)  | O2W-Ca1-O11             | 85.7(3)    | O5-Ca2-O8 <sup>ii</sup> | 78.16(13)  | O8 <sup>ii</sup> -Ca2-O5W | 77.24(15)  |
| O1-Ca1-O11  | 141.52(14) | O3W-Ca1-O10             | 81.4(2)    | O5-Ca2-O4W              | 149.67(14) | O8-Ca2-O6W                | 130.35(16) |
| O2-Ca1-O1W  | 130.2(2)   | O3W-Ca1-O11             | 75.59(18)  | O5-Ca2-O5W              | 121.69(15) | O8 <sup>ii</sup> -Ca2-O6W | 149.16(19) |
| O2-Ca1-O2W  | 85.0(2)    | O10-Ca1-O11             | 67.58(13)  | O5-Ca2-O6W              | 126.45(19) | O4W-Ca2-O5W               | 73.82(17)  |
| O2-Ca1-O3W  | 73.60(18)  | O4-Ca2-O5               | 65.60(12)  | O7-Ca2-O8               | 65.50(12)  | O4W-Ca2-O6W               | 81.39(19)  |
| O2-Ca1-O10  | 115.59(16) | O4-Ca2-O7               | 111.93(14) | O7-Ca2-O8 <sup>ii</sup> | 131.85(13) | O5W-Ca2-O6W               | 73.68(19)  |
| O2-Ca1-O11  | 147.90(15) | O4-Ca2-O8               | 143.73(13) | O7-Ca2-O4W              | 93.61(17)  |                           |            |
| O1W-Ca1-O3W | 155.5(2)   | O4-Ca2-O8 <sup>ii</sup> | 100.97(13) | O7-Ca2-O5W              | 146.97(17) |                           |            |
| O1W-Ca1-O2W | 87.5(3)    | O4-Ca2-O4W              | 140.73(15) | O7-Ca2-O6W              | 74.29(18)  |                           |            |

## 2

|                      |          |                      |           |        |          |                      |          |
|----------------------|----------|----------------------|-----------|--------|----------|----------------------|----------|
| Sr1-O1 <sup>i</sup>  | 2.567(5) | Sr1-O3W <sup>i</sup> | 2.485(8)  | Sr2-O4 | 2.574(5) | Sr2-O8 <sup>ii</sup> | 2.547(5) |
| Sr1-O2 <sup>i</sup>  | 2.593(6) | Sr1-O8W <sup>i</sup> | 2.685(12) | Sr2-O5 | 2.609(5) | Sr2-O4W              | 2.658(6) |
| Sr1-O1W <sup>i</sup> | 2.602(8) | Sr1-O10              | 2.570(5)  | Sr2-O7 | 2.547(5) | Sr2-O5W              | 2.680(7) |
| Sr1-O2W <sup>i</sup> | 2.495(9) | Sr1-O11              | 2.590(5)  | Sr2-O8 | 2.604(5) | Sr2-O6W              | 2.579(9) |

|             |            |             |           |                         |            |                           |            |
|-------------|------------|-------------|-----------|-------------------------|------------|---------------------------|------------|
| O1-Sr1-O2   | 63.33(16)  | O1W-Sr1-O3W | 152.4(3)  | O4-Sr2-O5               | 62.56(15)  | O7-Sr2-O8 <sup>ii</sup>   | 127.83(17) |
| O1-Sr1-O1W  | 80.2(2)    | O1W-Sr1-O8W | 63.3(4)   | O4-Sr2-O7               | 115.32(19) | O7-Sr2-O4W                | 93.7(2)    |
| O1-Sr1-O2W  | 142.7(3)   | O1W-Sr1-O10 | 81.9(2)   | O4-Sr2-O8               | 140.24(16) | O7-Sr2-O5W                | 149.9(2)   |
| O1-Sr1-O3W  | 121.5(3)   | O1W-Sr1-O11 | 76.3(2)   | O4-Sr2-O8 <sup>ii</sup> | 98.53(17)  | O7-Sr2-O6W                | 77.3(3)    |
| O1-Sr1-O8W  | 77.6(4)    | O2W-Sr1-O3W | 73.8(5)   | O4-Sr2-O4W              | 143.9(2)   | O8-Sr2-O8 <sup>ii</sup>   | 66.77(17)  |
| O1-Sr1-O10  | 82.35(17)  | O2W-Sr1-O8W | 69.5(5)   | O4-Sr2-O5W              | 69.3(2)    | O8-Sr2-O4W                | 71.61(19)  |
| O1-Sr1-O11  | 140.11(17) | O2W-Sr1-O10 | 135.7(2)  | O4-Sr2-O6W              | 83.0(3)    | O8 <sup>ii</sup> -Sr2-O4W | 77.5(2)    |
| O2-Sr1-O1W  | 134.8(3)   | O2W-Sr1-O11 | 73.6(2)   | O5-Sr2-O7               | 83.87(19)  | O8-Sr2-O5W                | 135.1(2)   |
| O2-Sr1-O2W  | 95.3(3)    | O3W-Sr1-O8W | 133.5(5)  | O5-Sr2-O8               | 78.00(16)  | O8 <sup>ii</sup> -Sr2-O5W | 77.6(2)    |
| O2-Sr1-O3W  | 72.0(3)    | O3W-Sr1-O10 | 84.4(3)   | O5-Sr2-O8 <sup>ii</sup> | 77.84(17)  | O8-Sr2-O6W                | 129.2(3)   |
| O2-Sr1-O8W  | 84.0(3)    | O3W-Sr1-O11 | 76.2(3)   | O5-Sr2-O4W              | 146.51(19) | O8 <sup>ii</sup> -Sr2-O6W | 148.7(4)   |
| O2-Sr1-O10  | 115.0(2)   | O8W-Sr1-O10 | 142.1(4)  | O5-Sr2-O5W              | 121.0(2)   | O4W-Sr2-O5W               | 74.8(2)    |
| O2-Sr1-O11  | 148.06(19) | O8W-Sr1-O11 | 117.9(3)  | O5-Sr2-O6W              | 128.3(4)   | O4W-Sr2-O6W               | 83.0(4)    |
| O1W-Sr1-O2W | 99.7(4)    | O10-Sr1-O11 | 62.90(16) | O7-Sr2-O8               | 61.75(16)  | O5W-Sr2-O6W               | 73.7(3)    |

## 3

|                        |          |                       |          |                       |          |                      |           |
|------------------------|----------|-----------------------|----------|-----------------------|----------|----------------------|-----------|
| Sr1-O1                 | 2.546(5) | Sr1-O2W               | 2.562(6) | Sr2-O11 <sup>iv</sup> | 2.637(6) | Sr3-O4 <sup>iv</sup> | 2.781(6)  |
| Sr1-O2                 | 2.650(6) | Sr1-O3W               | 2.604(8) | Sr2-O6W               | 2.602(7) | Sr3-O5 <sup>iv</sup> | 2.677(7)  |
| Sr1-O1X <sup>iii</sup> | 2.602(5) | Sr2-O7                | 2.617(5) | Sr2-O7W               | 2.571(7) | Sr3-O10W             | 2.587(16) |
| Sr1-O2X                | 2.503(5) | Sr2-O8                | 2.654(5) | Sr2-O8W               | 2.547(7) | Sr3-O14W             | 2.56(3)   |
| Sr1-O1W                | 2.655(7) | Sr2-O10 <sup>iv</sup> | 2.631(5) | Sr2-O9W               | 2.499(7) |                      |           |

|                            |            |                             |            |                         |           |                                          |            |
|----------------------------|------------|-----------------------------|------------|-------------------------|-----------|------------------------------------------|------------|
| O1-Sr1-O2                  | 62.95(18)  | O1x <sup>iii</sup> -Sr1-O3W | 137.8(3)   | O10-Sr2-O6W             | 82.7(2)   | O4 <sup>iv</sup> -Sr3-O5                 | 120.21(19) |
| O1-Sr1-O1x                 | 78.27(17)  | O2x-Sr1-O1W                 | 145.81(19) | O10-Sr2-O7W             | 133.0(2)  | O4 <sup>iv</sup> -Sr3-O5 <sup>iv</sup>   | 59.79(19)  |
| O1-Sr1-O1x <sup>iii</sup>  | 73.10(18)  | O2x-Sr1-O2W                 | 87.9(3)    | O10-Sr2-O8W             | 71.57(19) | O4 <sup>iv</sup> -Sr3-O10W               | 72.9(5)    |
| O1-Sr1-O2x                 | 102.2(2)   | O2x-Sr1-O3W                 | 79.1(3)    | O10-Sr2-O9W             | 79.4(2)   | O4 <sup>iv</sup> -Sr3-O10W <sup>iv</sup> | 107.1(5)   |
| O1-Sr1-O1W                 | 79.0(0)    | O1W-Sr1-O2W                 | 110.6(2)   | O11-Sr2-O6W             | 78.5(2)   | O4 <sup>iv</sup> -Sr3-O14W               | 113.9(5)   |
| O1-Sr1-O2W                 | 145.3(2)   | O1W-Sr1-O3W                 | 76.5(3)    | O11-Sr2-O7W             | 74.8(2)   | O4 <sup>iv</sup> -Sr3-O14W <sup>iv</sup> | 66.1(5)    |
| O1-Sr1-O3W                 | 134.3(3)   | O2W-Sr1-O3W                 | 80.0(3)    | O11-Sr2-O8W             | 84.8(2)   | O5-Sr3-O5 <sup>iv</sup>                  | 180        |
| O2-Sr1-O1x                 | 117.06(19) | O7-Sr2-O8                   | 62.25(16)  | O11-Sr2-O9W             | 139.0(2)  | O5-Sr3-O10W                              | 71.0(4)    |
| O2-Sr1-O1x <sup>iii</sup>  | 131.38(17) | O7-Sr2-O10                  | 131.03(17) | O6W-Sr2-O7W             | 107.2(3)  | O5-Sr3-O10W <sup>iv</sup>                | 109.0(4)   |
| O2-Sr1-O2x                 | 78.19(19)  | O7-Sr2-O11                  | 143.8(2)   | O6W-Sr2-O8W             | 153.7(2)  | O5-Sr3-O14W                              | 96.9(7)    |
| O2-Sr1-O1W                 | 72.1(2)    | O7-Sr2-O6W                  | 131.5(2)   | O6W-Sr2-O9W             | 83.7(3)   | O5-Sr3-O14W <sup>iv</sup>                | 83.1(7)    |
| O2-Sr1-O2W                 | 151.4(2)   | O7-Sr2-O7W                  | 76.3(2)    | O7W-Sr2-O8W             | 87.4(3)   | O5 <sup>iv</sup> -Sr3-O10W               | 109.0(4)   |
| O2-Sr1-O3W                 | 73.0(3)    | O7-Sr2-O8W                  | 72.40(19)  | O7W-Sr2-O9W             | 146.1(3)  | O5 <sup>iv</sup> -Sr3-O10W <sup>iv</sup> | 71.0(4)    |
| O1x-Sr1-O1x <sup>iii</sup> | 70.11(17)  | O7-Sr2-O9W                  | 72.8(2)    | O8W-Sr2-O9W             | 96.3(3)   | O5 <sup>iv</sup> -Sr3-O14W               | 83.1(7)    |
| O1x-Sr1-O2x                | 63.42(16)  | O8-Sr2-O10                  | 147.08(19) | O4-Sr3-O4 <sup>iv</sup> | 180       | O5 <sup>iv</sup> -Sr3-O14W <sup>iv</sup> | 96.9(7)    |

|                             |            |             |            |                           |            |                                            |          |
|-----------------------------|------------|-------------|------------|---------------------------|------------|--------------------------------------------|----------|
| O1x <sup>iii</sup> -Sr1-O2x | 133.13(17) | O8-Sr2-O11  | 129.04(18) | O4-Sr3-O5                 | 59.79(19)  | O10W-Sr3-O10W <sup>iv</sup>                | 180      |
| O1x-Sr1-O1W                 | 146.89(18) | O8-Sr2-O6W  | 71.7(2)    | O4-Sr3-O5 <sup>iv</sup>   | 120.21(19) | O10W-Sr3-O14W                              | 70.9(9)  |
| O1x <sup>iii</sup> -Sr1-O1W | 80.42(17)  | O8-Sr2-O7W  | 75.8(2)    | O4-Sr3-O10w               | 107.1(5)   | O10W-Sr3-O14W <sup>iv</sup>                | 109.1(9) |
| O1x-Sr1-O2W                 | 77.0(2)    | O8-Sr2-O8W  | 134.09(19) | O4-Sr3-O10w <sup>iv</sup> | 72.9(5)    | O10W <sup>iv</sup> -Sr3-O14W               | 109.1(9) |
| O1x <sup>iii</sup> -Sr1-O2W | 75.8(2)    | O8-Sr2-O9W  | 77.6(3)    | O4-Sr3-O14w               | 66.1(5)    | O10W <sup>iv</sup> -Sr3-O14W <sup>iv</sup> | 70.9(9)  |
| O1x-Sr1-O3W                 | 136.2(3)   | O10-Sr2-O11 | 62.04(17)  | O4-Sr3-O14w <sup>iv</sup> | 113.9(5)   | O14W-Sr3-O14W <sup>iv</sup>                | 180      |

<sup>a</sup>Symmetry code: (i) =  $x, 1-y, -1/2+z$ ; (ii) =  $1/2-x, 1/2-y, 1-z$ ; (iii) =  $-x, 2-y, -z$ ; (iv) =  $-x, 1-y, -z$ .

**Table S2.** Results of the *SHAPE* analysis for the Ca(II) and Sr(II) cores in **1-3**

| Compound | Atom | CU-8*        | SAPR-8*      | TDD-8*       | JBTPR-8*  | BTPR-8*      |
|----------|------|--------------|--------------|--------------|-----------|--------------|
| <b>1</b> | Ca2  | 8.639        | 3.618        | <b>1.249</b> | 2.827     | 2.193        |
|          | Sr1  | 8.692        | <b>1.878</b> | 1.980        | 2.930     | 2.389        |
| <b>2</b> | Sr2  | 9.329        | 3.990        | <b>1.733</b> | 3.079     | 2.233        |
|          | Sr1  | 11.189       | 1.509        | <b>1.385</b> | 2.681     | 1.913        |
| <b>3</b> | Sr2  | 9.434        | 2.076        | 2.017        | 2.144     | <b>1.479</b> |
|          | Sr3  | <b>0.999</b> | 11.515       | 8.545        | 12.571    | 12.464       |
| Compound | Atom | PBPY-7**     | COC-7**      | CTPR-7**     | JPBPY-7** | JETPY-7**    |
| <b>1</b> | Ca1  | 5.001        | 2.081        | <b>0.699</b> | 8.058     | 19.482       |

\*CU-8, Cube; SAPR-8, Square antiprism; TDD-8, Triangular dodecahedron; JBTPR-8, Biaugmented trigonal prism J50; BTPR-8 Biaugmented trigonal prism. \*\*PBPY-7, Pentagonal bipyramid; COC-7, Capped octahedron; CTPR-7, Capped trigonal prism; JPBPY-7, Pentagonal bipyramid J13; JETPY-7, Elongated triangular pyramid J7.
